# 1 **Exploring Taxonomic and Functional Microbiome of Hawaiian Stream and** 2 **Spring Irrigation Water Systems Using Illumina and Oxford Nanopore** 3 **Sequencing Platforms**

4  
5 Diksha Klair<sup>1</sup>, Shefali Dobhal<sup>1</sup>, Amjad Ahmed<sup>2</sup>, Zohaib Ul Hassan<sup>3,4,5</sup>, Jensen Uyeda<sup>2</sup>, Joshua  
6 Silva<sup>2</sup>, Koon-Hui Wang<sup>1</sup>, Seil Kim<sup>3,4,5</sup>, Anne M. Alvarez<sup>1</sup>, and Mohammad Arif<sup>1\*</sup>

7  
8 <sup>1</sup>Department of Plant and Environmental Protection Sciences, University of Hawaii at Manoa, Honolulu, HI, USA.

9  
10 <sup>2</sup>Department of Tropical Plant and Soil Sciences, University of Hawaii at Manoa, Honolulu, HI, USA.

11  
12 <sup>3</sup>Group for Biometrology, Korea Research Institute of Standards and Science (KRISS), Daejeon, 34113, Republic of  
13 Korea

14 <sup>4</sup>Convergent Research Center for Emerging Virus Infection, Korea Research Institute of Chemical Technology  
15 (KRICT), Daejeon 34114, Republic of Korea

16 <sup>5</sup> Department of Bio-Medical Measurement, University of Science & Technology (UST), Daejeon 34113, Republic  
17 of Korea

18  
19  
20 \*Corresponding author: arif@hawaii.edu; Phone +1 808-956-7765  
21

## 22 23 **ABSTRACT**

24 Irrigation water is a potential source of contamination that carries plant and foodborne human  
25 pathogens and provides a niche for survival and proliferation of microbes in agricultural settings.  
26 This project investigated bacterial communities and their functions in the irrigation water from  
27 wetland taro farms on Oahu, Hawai'i using different DNA sequencing platforms. Irrigation water  
28 samples (stream, spring, and tank stored water) were collected from North, East, and West sides  
29 of Oahu and subjected to high quality DNA isolation, library preparation and sequencing of the  
30 V3-V4 region, full length 16S rRNA, and shotgun metagenome sequencing using Illumina  
31 iSeq100, Oxford Nanopore MinION and Illumina NovaSeq, respectively. Illumina reads  
32 provided the most comprehensive taxonomic classification at the phylum level where

33 Proteobacteria was identified as the most abundant phyla in river stream source and associated  
34 wet taro field water samples. Cyanobacteria was also a dominant phylum from tank and spring  
35 water, whereas Bacteroidetes were most abundant in wetland taro fields irrigated with spring  
36 water. However, over 50% of the valid short amplicon reads remained unclassified and  
37 inconclusive at the species level. Whereas samples sequenced for full length 16S rRNA and  
38 shotgun metagenome, clearly illustrated that Oxford Nanopore MinION is a better choice to  
39 classify the microbes to the genus and species levels. In terms of functional analyses, only 12%  
40 of the genes were shared by two consortia. Total 95 antibiotic resistant genes (ARGs) were  
41 detected with variable relative abundance. Description of microbial communities and their  
42 functions are essential for the development of better water management strategies to produce  
43 safer fresh produce and to protect plant, animal, human and environmental health. This project  
44 identified analytical tools to study microbiome of irrigation water.

45 **Keywords:** Amplicon, bacterial microbiota, functional microbiome, Illumina, irrigation water  
46 microbiome, Nanopore MinION, shotgun metagenome, wetland taro.

47

## 48 **INTRODUCTION**

49 Irrigation water quality is a growing concern for agriculture as drainage is contaminated with  
50 agricultural runoff, wastewater overflows, and polluted storm or rainwater runoff, and irrigation  
51 waters are a potential source of plant and food-borne pathogens resulting in economic crop losses  
52 and human health risks (1, 2, 3). The microbial populations sharing the same niche may be  
53 commensal, symbiotic, or pathogenic. Many pathogenic bacteria can survive and proliferate in  
54 contaminated water and agricultural settings for long duration under favorable biotic and abiotic

55 conditions (4, 5, 6). Studies have revealed that contaminated water splash can be a potential  
56 carrier of plant and food-borne pathogens (7, 8) that can enter plants through stomata,  
57 hydathodes and wounds (9). Also, antibiotics introduced through contaminated water are a  
58 continuing challenge as they may result in high selection pressure for antibiotic-resistant bacteria  
59 (10, 11, 12) and can persist even after water treatment.

60 Because of water scarcity and a simultaneous need to increase food production, there has been a  
61 shift from freshwater to alternative sources of irrigation water such as reclaimed or recycled  
62 water. However, potential health and environmental impact concerns are associated with the use  
63 of alternative water sources for irrigating the crops (13). Therefore, uncovering the bacterial  
64 composition and its associated functions in irrigation water will provide insight into formulating  
65 new disease management strategies and preventing major economic and public health risks.

66 High-throughput sequencing has facilitated the identification of complex bacterial communities  
67 (14) independently of bacterial culture (15, 16). The bacterial microbiota is identified by  
68 analyzing the prokaryotic 16S ribosomal RNA (rRNA; ~1,500 bp long) with nine variable  
69 regions interspaced between conserved regions. The 16S rRNA region selected for sequencing  
70 depends on the experimental objectives, design, and sample type. Sequencing of variable regions  
71 of the 16S rRNA gene using the most popular sequencing platforms, such as Illumina  
72 technology, uncovers the majority of bacterial microbiota (17). Illumina technology only permits  
73 sequencing of short variable regions of the 16S rRNA gene (18), and therefore, taxonomic  
74 assignment of reads at the species level may be elusive. Different species within a genus possess  
75 different phenotypic and virulence characteristics, therefore, accurate speciation of bacterial  
76 species is of utmost importance for formulating effective disease management strategies against  
77 pathogenic bacterial communities.

78 With the advancement in next generation sequencing technologies (NGS), 3<sup>rd</sup> generation NGS  
79 technology, Oxford Nanopore enables generation of long sequence read lengths, possibly  
80 sequencing full length 16S rRNA genes (19). Full length sequences covering maximum  
81 nucleotide heterogeneity and discriminatory power allow better identification at the genus and  
82 species level. Comparative studies for Oxford Nanopore and Illumina 16S rRNA gene  
83 sequencing demonstrated similar bacterial composition at the genus level, although significant  
84 differences were observed at the species level (20). However, this technology complicates  
85 accurate species classification, particularly for bacterial species with a high sequence similarity  
86 in the 16S rRNA gene, owing to higher sequencing error rates (21).

87 Although Polymorphic marker gene (e.g., 16S rRNA, ITS) based analyses are useful for broad  
88 community taxonomical analysis, it did not provide functionality nor resolve the complexity of a  
89 microbiome. The shotgun metagenomic sequencing using advanced Illumina sequencing  
90 platforms have been proven to be a more reliable approach for these purposes (22). Metagenomic  
91 sequencing is a powerful tool for investigating occurrence, abundance, and distribution of ARGs  
92 in the natural environment and is suitable for discovery of novel ARGs that remain unidentified  
93 in culture-and amplicon-based analyses (23, 24).

94 This study aimed to investigate bacterial microbiota and associated gene function of different  
95 irrigation systems, mainly associated with wetland taro across the island of Oahu, Hawai'i.  
96 Mountain streams are the major source of irrigation waters used by farmers to irrigate crops. The  
97 overall goal of this project is to reveal the bacterial microbiota from different water source used  
98 for irrigation, in addition to field water, which is released back into the stream after use, carrying  
99 excess fertilizer, agricultural waste, ARGs and diverse unidentified bacteria. Bacterial  
100 communities were investigated based on 16S rRNA amplicon analysis using two principally

101 different sequencing technologies and platforms—Illumina iSeq100 and Oxford Nanopore  
102 MinION and their taxonomic compositions were compared. The functionality of all the genes in  
103 complex samples and the distribution of ARGs were also investigated using shotgun  
104 metagenomic analyses. We aim to compare different technologies and approaches considered for  
105 microbiome studies such as shotgun metagenome, short-and long-amplicon read based to provide  
106 the desired level of accuracy in resolving the microbial taxonomic composition of the samples.

107

## 108 **MATERIALS AND METHODS**

109 **Sample collection.** Irrigation source and associated taro field water samples were collected in  
110 September - November 2020, across the Island of Oahu, Hawai'i. Irrigation water samples—R-  
111 S1-E, R-S2-W, R-S4-SE, and R-S5-SE—collected from natural streams which were sources of  
112 irrigation water for taro fields. Two water samples R-S7-N (stream emerging from the main  
113 reservoir on Oahu) and T-S6-N (tank storage water) were sources of irrigation for horticultural  
114 crops and other agricultural practices. Taro field water samples, R-F1-E, R-F2-W, R-F4-SE, and  
115 R-F5-SE, associated with R-S1-E, R-S2-W, R-S4-SE, and R-S5-SE, respectively, were collected  
116 to analyze bacterial microbiota. Two water samples, S-S3-N and S-F3-N were collected from a  
117 spring water source and an associated taro field, respectively. From each sampling site, 3  
118 replicate water samples (2L per sample) were collected in sterile glass bottles, submerged 10 to  
119 15 cm below the water surface. Samples were transported in an ice-cooler and processed in the  
120 laboratory for DNA isolation.

121 **Sample processing.** Water samples collected from each site were vacuum filtered using the  
122 Millipore All-Glass Filter Holder kit (EMD Millipore Corporation, Billerica, MA). Collected  
123 water from each replicate was filtered through Whatman filter membrane to remove coarse to

124 medium debris, followed by filtration through a MF-Millipore 8 µm sterile mixed cellulose ester  
125 (MCE) membrane (Merck Millipore Ltd., Tullagreen Carrigtwohill, Co. Cork, Ireland), and  
126 finally, filtered via MF-Millipore 0.22 µm sterile MCE membrane to trap the maximum bacterial  
127 community. The 0.22 µm membrane was used for bacterial DNA isolation using NucleoMag  
128 DNA/RNA Water Kit (MACHEREY-NAGEL Inc., Bethlehem, PA) following manufacturer's  
129 instructions, with a few minor modifications to improve the DNA quantity and quality. The  
130 mechanical lysis was performed in lysis buffer MWA1 for 20 minutes using a vortex at full  
131 speed, followed by the addition of 25 µl of RNase (12mg/ml stock solution); the tubes were  
132 incubated for 15 minutes at room temperature (RT). A lysate of 450 µl was transferred to a 1.5  
133 ml sterile Eppendorf tube and 25 µl of NucleoMag B-beads were added, mixed and shaken for 5  
134 minutes, and kept on a magnetic rack at RT. The supernatant was removed, and the pellet was  
135 washed twice with buffer MWA3, followed by a single final wash with buffer MWA4. The  
136 magnetic beads were air dried for 15 minutes at RT; 70 µl RNase free water was used to elute  
137 DNA from the magnetic beads. Qubit dsDNA HS kit and Qubit 4 (Thermo Fisher Scientific,  
138 Waltham, MA) were used to quantify the genomic DNA. The DNA replicates from each sample  
139 were pooled for downstream processes and stored at -80°C.

140 **Illumina 16S rRNA library preparation, sequencing, and analysis.** The polymerase chain  
141 reaction (PCR) was performed to amplify the V3-V4 hypervariable region of 16S rRNA gene  
142 following the reaction conditions: 94°C for 5 min; 40 cycles at 94°C for 20 s, 58°C for 30 s, and  
143 72°C for 1 min; and the final extension at 72°C for 3 min. Primers 341F (5'-  
144 TCGTCGGCAGCGTCAGATGTGTATAAGAGACAGCCTACGGGNGGCWGCAG-3') and 805R  
145 (5'-GTCTCGTGGGCTCGGAGATGTGTATAAGAGACAGGACTACHVGGGTATCTAATCC-3')  
146 were used for PCR amplification (25). The amplified PCR amplicons were enzymatically

147 cleaned using ExoSAP-IT (Affymetrix, Santa Clara, CA) and quantified using Qubit dsDNA HS  
148 Kit and Qubit 4. A secondary bead-linked transposome (BLT) PCR was performed using i5 and  
149 i7 adapters, provided in Nextera DNA Flex Library Prep Kit (Illumina, Inc., San Diego, CA), for  
150 barcode attachment (Supplemental Table 1). Each sample's library was prepared in duplicate.  
151 The BLT PCR conditions were initial denaturation at 98°C for 3 min, followed by X cycles of  
152 98°C for 45 sec, 62°C for 30 sec, and 68°C for 2 min, with a final extension at 68°C for 1 min.  
153 The number of cycles of BLT PCR's (X) was decided based on the amplicon concentration from  
154 the previous PCR as recommended by the manufacturer. Samples with concentrations ranging  
155 from 1-9 ng/μl and 9-21 ng/μl were subjected to 8 and 12 cycles BLT PCR, respectively. The  
156 amplicon libraries were cleaned using double-sided bead purification protocol following the  
157 manufacturer's instructions. The purified libraries were quantified, normalized to 1 nM  
158 concentration and pooled. The pooled library was spiked with 2% using Phix control and loaded  
159 to Illumina iSeq100 for sequencing with a total of 302 run cycles to generate paired-end 150-bp  
160 reads. The total data yield was 717 MB with Q30 value of 88.1% and 89.6% for Read 1 and  
161 Read 2, respectively.

162 The sequenced data was base called and analyzed using BaseSpace sequence hub and  
163 EzBioCloud, respectively (26). The paired-end reads were used as a quality control to filter out  
164 low-quality (average quality value < 25) and merged using PandaSeq (27); primers were  
165 trimmed at a similarity cut-off of 0.8. The pipeline uses EzBioCloud database for taxonomic  
166 assignment and sequence similarity was calculated via pair-wise alignment. The chimeric reads  
167 with less than a 97% best hit similarity rate were removed using EzBioCloud non-chimeric 16S  
168 rRNA database through UCHIME (28). The sequenced data was clustered using CD-Hit7 and  
169 UCLUST with 97% similarity (29). Bacterial diversity was also analyzed and compared among

170 the samples. For alpha diversity—OTUs, richness, and diversity were calculated, while for beta  
171 diversity—principal coordinate analysis (PCoA) and UPGMA clustering analyses were  
172 performed.

173 Valid reads were normalized for each sample to eliminate the bias produced because of variation  
174 in total number of reads. The Wilcoxon rank-sum test was used to calculate differences between  
175 the replicates. The differences in relative abundance in phyla and genera among the samples  
176 were determined using one-way ANOVA (single factor) with the least significant difference  
177 (LSD) test at  $\alpha=0.05$ .

178 **Oxford Nanopore 16S rRNA library preparation, sequencing, and analysis.** The genomic  
179 DNA of sample R-F1-E and S-F3-N was diluted to 1 ng/ $\mu$ l, and a total 10  $\mu$ l gDNA was used for  
180 full-length 16S rRNA library preparation using 16S Barcoding Kit 1-24 (SQK-16S024; Oxford  
181 Nanopore Technologies, Oxford Science Park, UK) according to the manufacturer's protocol.  
182 Ten  $\mu$ l of input DNA (10 ng) was mixed well with 25  $\mu$ l LongAmp hot Start Taq 2X Master Mix  
183 and 5  $\mu$ l of nuclease free water, afterward, 10  $\mu$ l of each 16S barcode was added. The PCR was  
184 performed using following conditions: Initial denaturation at 95 °C for 1 min, 25 cycles of 95 °C  
185 for 20 sec, 55 °C for 30 sec and 65 °C for 2 min, with a final extension at 65 °C for 5 min. Each  
186 amplified sample was purified and washed with AMPure XP beads and 70% ethanol,  
187 respectively. For each sample, barcoded libraries were prepared in duplicate and quantified using  
188 Qubit Qubit 4; libraries were pooled to a desired ratio of 50-100 fmol in 10  $\mu$ l of 10 mM Tris-  
189 HCl (pH 8.0) with 50 mM NaCl, and 1  $\mu$ l of Rapid adapter (RAP) was added. The pooled library  
190 was loaded on to MinION vR9.4 flow cell and sequenced following manufacturer's instruction.  
191 The generated sequencing data were monitored in real-time using the MinKNOW software  
192 (version 4.0.20). The obtained FAST5 files were base called using MinKNOW (version 4.0.20)



193 embedded with Guppy version 3.2.10 pipeline. The generated full-length 16S rRNA sequence  
194 data were analyzed using cloud based EPI2ME (Oxford Nanopore) workflow for the  
195 identification of microbial community composition; EP2ME uses the NCBI GenBank database  
196 for taxonomic identification. The minimum and maximum read length of 1,500 and 1,600,  
197 respectively, were assigned as a quality control parameter, and Blastn was run using parameters  
198 max\_target seqs=3 (finds the top three hits that are statistically significant) with blast e-value  
199 assigned as default 0.01. Per read coverage was calculated as the number of identical  
200 matches/query length. All classified reads were filtered for >77% accuracy and >30% coverage,  
201 which removed invalid alignments and were normalized for analysis. Results were obtained as  
202 comma-separated values (CSV) file via web report generated by EPI2ME workflow.

203 **Metagenomic library preparation, sequencing, and analysis.** DNA from two samples (R-F1-  
204 E and S-F3-N) were used for preparing DNA metagenome libraries using NEBNext Ultra DNA  
205 Library Prep Kit (NEB, Ipswich, MA) following manufacturer's instructions. The sonication-  
206 based method was used for fragmenting gDNA to the size of 350 bp. The obtained DNA  
207 fragments were end-polished, A-tailed, and ligated with full-length indexing adapters to the ends  
208 of the DNA fragments, followed by PCR amplification. The PCR products were purified using  
209 AMPure XP, and libraries were analyzed for size distribution and quantified using Agilent 2100  
210 Bioanalyzer (Agilent, Santa Clara, CA) and real-time qPCR, respectively. The quantified  
211 libraries were pooled and sequenced on an Illumina NovaSeq 6000 platform to generate paired  
212 end reads. The obtained raw reads were pre-processed to trim low-quality bases with quality  
213 value (Q-value  $\leq$  38), reads with N nucleotides over 10 bp, and reads that overlapped with  
214 adapters over 15 bp. The obtained clean reads after quality control were assembled into scaffigs  
215 using MEGAHIT (30). The quality of the assembled data was predicted by N50 length. Scaffigs

216 (≥500bp) were used for ORF (Open reading Frame) prediction using MetaGeneMark (31) and  
217 the ORF's less than 100 nt were removed. Non-redundant gene catalogue, generated using CD-  
218 HIT (32), was further used to map clean reads using SoapAligner (33). Each metagenomic  
219 homolog was taxonomically annotated against NR database (34) for classification of microbial  
220 community at different taxonomic levels. For functional analysis, Kyoto Encyclopedia of Genes  
221 and Genomes (KEGG), evolutionary genealogy of genes: Non-Supervised Orthologous Groups  
222 (eggNOG), and Carbohydrate-Active enzymes (CAZy) databases were used for mapping  
223 functionally annotated unigenes. For Antibiotic Resistance Genes (AGRs) analysis, all the  
224 unique genes were BLASTp against the CARD (Comprehensive Antibiotic Research Database)  
225 database ( $e\text{-value} \leq 1e^{-5}$ ). To identify the biologically relevant differences between two samples,  
226 statistical analyses were performed using STAMP v 2.1.3 (35), employing Fisher's exact test  
227 with Newcombe-Wilson CI method (0.95 confidence interval) and Benjamini-Hochberg FDR  
228 correction factors and visualized using extended error bar plots.

229

## 230 **RESULTS**

231 **Short length amplicon-based analysis—Illumina.** The paired end 16S rRNA encoding gene  
232 sequences were obtained using Illumina iSeq100. After the data was pre-filtered and passed the  
233 quality check to remove low-quality, non-chimeric and non-target amplicons, the total number of  
234 valid reads with an average read length was computed (Supplemental Table 2) for each sample.  
235 Each sample was successfully sequenced in duplicate, except sample S-S3-N that encountered  
236 sequencing biasness in the 2<sup>nd</sup> replicate run and failed to produce enough valid reads. After  
237 quality control, an average of 43,599 and 41,163 valid reads from the first and second replicate

238 run, respectively, were obtained. In both the replicates, the highest and lowest number of valid  
239 reads were observed in sample R-S2-W (61,272 and 67,325) and R-F4-SE (22,274 and 26,908),  
240 respectively.

241 Based on phylum comparison performed using valid reads obtained from two sequencing  
242 replicates, no differences were observed, therefore the first replicate (barcode1-12) was  
243 considered for further taxonomic and diversity analysis (Supplementary Fig. 1). The valid reads  
244 generated from each sample were normalized to the least number of obtained valid reads  
245 (22,274; R-F4-SE) to overcome biasness in analysis outcomes. The reads were further clustered  
246 into operational taxonomic units (OTUs) at 97% identity ranging from 1,410 to 4,897. The OTU  
247 number remained higher in river stream sources, R-S1-E (3,416), R-S2-W (4,059), R-S4-SE  
248 (2,817), and R-S5-SE (4,897), compared with associated field water, R-F1-E (1,570), R-F2-W  
249 (2,753), R-F4-SE (1,978), and R-F5-SE (2,946). However, in spring source and field water  
250 samples, the OTU count remained comparable (Table 1). Furthermore, sample T-S6-N had the  
251 lowest count of 1,077 identified OTUs, followed by sample R-S7-N with 1,410 OTU numbers.

252 **Table 1.** List of total number of OTUs and calculated diversity analysis.

| Sample  | OTUs  | ACE      | CHAO     | Jackknife | Shannon | Simpson | Phylogenetic Diversity | Good's Coverage of Library (%) |
|---------|-------|----------|----------|-----------|---------|---------|------------------------|--------------------------------|
| R-F1-E  | 1,570 | 2,712.05 | 2,458.62 | 3,062.1   | 3.97    | 0.12    | 1,635                  | 96.57                          |
| R-S1-E  | 3,416 | 5,924.43 | 5,273.62 | 6,074.57  | 5.35    | 0.08    | 4,165                  | 92.35                          |
| R-S2-W  | 4,059 | 6,950.62 | 6,139.12 | 7,115.85  | 6.21    | 0.03    | 4,241                  | 91.02                          |
| R-F2-W  | 2,753 | 3,513.98 | 3,231.47 | 3,649     | 5.17    | 0.08    | 3,230                  | 95.98                          |
| S-S3-N  | 2,153 | 3,149.55 | 2,905.06 | 3,240.36  | 4.34    | 0.14    | 2,378                  | 96.14                          |
| S-F3-N  | 2,157 | 3,526.22 | 3,221.37 | 3,746.8   | 4.35    | 0.1     | 1,435                  | 95.49                          |
| R-S4-SE | 2,817 | 4,123.62 | 3,730.12 | 3,994.1   | 5.28    | 0.04    | 3,516                  | 94.86                          |
| R-F4-SE | 1,978 | 2,408.57 | 2,214.96 | 2,521     | 4.42    | 0.11    | 2,473                  | 97.56                          |
| R-S5-SE | 4,897 | 7,684.84 | 6,782.04 | 7,219.57  | 6.86    | 0.01    | 4,739                  | 89.97                          |
| R-F5-SE | 2,946 | 4,257.84 | 3,804.92 | 4,166.01  | 4.91    | 0.09    | 3,116                  | 94.56                          |
| T-S6-N  | 1,077 | 1,656.5  | 1,522.44 | 1,763.94  | 2.88    | 0.34    | 1,106                  | 97.93                          |
| R-S7-N  | 1,410 | 1,818.37 | 1,697.27 | 1,859.62  | 4.97    | 0.02    | 1,359                  | 97.99                          |

253

254 **Taxonomic classification at phylum, genus, and species levels.** Based on Good's coverage  
255 index, the sequencing covered more than 94% of the taxonomic richness except for sample R-  
256 S1-E (92.35%), R-S2-W (91.02%) and R-S5-SE (89.97%; Table 1). A total of 18 phyla with  
257 relative abundance of >1% were compared after being identified in at least one sample (Figure  
258 1A). Proteobacteria, a phylum with major plant and food-borne pathogens, was significantly the  
259 most abundant phylum in 12 different samples (Supplemental Table 3). The relative abundance  
260 of Proteobacteria was higher in river stream source samples, R-S1-E (76.99%), R-S2-W  
261 (71.28%), R-S4-SE (83.71%), and R-S5-SE (52.04%), and associated field samples, R-F1-E  
262 (66.57%), R-F2-W (78.64%), R-F4-SE (89.08%), and R-F5-SE (75.70%). Considering samples  
263 collected from North Oahu, Cyanobacteria was the topmost abundant phylum identified from the  
264 spring water sample S-S3-N (35.86%) and stored tank water sample T-S6-N (58.39%).  
265 Bacteroidetes was the most dominant phylum in spring water irrigated field with relative  
266 abundance of 48.82% and interestingly this phylum was also higher in the stream water irrigated  
267 field sample, R-F1-E (31.63%), whereas it remained <6.9% of relative abundance in other river  
268 stream source and associated field water samples. Phylum Actinobacteria was relatively higher  
269 in the reservoir stream source, R-S7-N (26.82%) compared with other samples. Other identified  
270 phyla varied in their relative abundance among all the samples, as shown in Figure 1A. The  
271 normalized valid reads from all the 12 samples were classified and compared at the genus level  
272 (Figure 1B). The taxonomic classifier used to classify valid reads identified uncultured genera  
273 and best hit genera classified with high and low confidence values, while the rest remained  
274 unclassified at a taxonomic level (genus-species). The genera within the family  
275 Comamonadaceae were classified as significantly most abundant among all the other identified

276 genera and named as Comamonadaceae\_uc by the taxonomic classifier (Supplemental Table 4).  
277 The taxonomic classifier could not differentiate the genera within the family Comamonadaceae  
278 owing to low confidence value in assigning the best hit to the reference database—indicating that  
279 short amplicon reads might not be efficient in classifying valid reads with high accuracy. The  
280 abundance of Comamonadaceae\_uc was relatively higher in natural stream sources and  
281 associated field samples. *Prochlorococcus* was the most abundant genus identified in samples T-  
282 S6-N (58.3%) and S-S3-N (35.65%) collected from North Oahu. Spring field water sample S-F3-  
283 N was dominated by the genus *Flavobacterium* with relative abundance of 37.14%, while  
284 16.99% *Flavobacterium* abundance was calculated in sample R-F1-E—the abundance remained  
285 <1% in all the other river stream and associated field water samples. The classified reads at the  
286 genus level, with a relative abundance of <1%, ranged between 22.32 - 61.87% among all  
287 samples, indicating diverse microbiota associated with different samples. The percentage of valid  
288 reads that remained unclassified varied between 4.83% (T-S6-N) and 21.55% (R-S4-SE) among  
289 all the samples (Supplemental Table 5).

290 At the species level, valid reads that remained unclassified among all the 12 samples ranged from  
291 11.2% (T-S6-N) to 62.23% (R-F4-SE) (Supplemental Table 5). A total of 34 species classified at  
292 species level using EzBioCloud with relative abundance of more than 1%, only three species,  
293 *Flavobacterium fontis*, *F. hydatis* and *F. shanxiense*, remained classified with a high confidence  
294 value—indicating that the short length reads-based approach for classifying at species level is an  
295 inadequate approach for attaining species level resolution (Supplementary Fig. 2).

296 **Alpha and Beta diversity analyses.** Non-parametric analysis of diversity indices, such as ACE,  
297 CHAO, and Jackknife, indicated higher bacterial diversity in river stream compared to associated  
298 field water samples, followed by sample S-F3-N, S-S3-N, R-S7-N, and T-S6-N (Table 1). The

299 higher Shannon diversity indices of river stream source field water indicated an increased  
300 abundance and bacterial community than associated field water; however, a negligible difference  
301 between spring source S-S3-N (4.34) and field water S-F3-N (4.35) was observed (Table 1). The  
302 Shannon diversity calculated for sample T-S6-N and R-S7-N was 2.88 and 4.97, respectively.  
303 Taken together, natural stream source water contaminated with fertilizer runoff, wastewater  
304 runoff and other agricultural waste showed higher diversity in the bacterial community.

305 To compare the relationship between bacterial communities in all the samples at the genus level,  
306 PCoA (Principal Coordinate Analysis) and UPGMA (unweighted pair group method with  
307 arithmetic mean) clustering based on the Bray-Curtis dissimilarity index were performed. The  
308 beta diversity indices, based on PCoA, revealed clear distinctions between different water  
309 samples forming three distinctive clusters (Figure 1C). Cluster one was formed exclusively by  
310 natural stream sources and associated with wet taro field water samples irrespective of the  
311 sampling site except for sample R-F1-E. The second distinctive cluster was formed by water  
312 samples collected from North Oahu, S-S3-N, T-S6-N, and R-S7-N, except S-F3-N. Interestingly,  
313 the 3rd cluster was formed by field water samples R-F1-E and S-F3-N indicating a close  
314 association between their bacterial communities, despite having been surveyed from different  
315 geographical locations and irrigated by different water sources (spring and river sources).

316 Furthermore, UPGMA clustering revealed a similar clustering pattern in the dissimilarity of  
317 relative abundance of the bacterial communities (Supplementary Fig. 3). To unravel the close  
318 microbial association between R-F1-E and S-F3-N, these two samples were further sequenced to  
319 obtain full length 16S RNA and metagenomes using Oxford Nanopore MinION and Illumina  
320 NovaSeq, respectively, for amplicon and functional analyses.

321 **Full length 16S RNA amplicon analysis—Oxford Nanopore MinION.** Samples R-F1-E and  
322 S-F3-N were sequenced in duplicate to attain confidence and reliability in the obtained data  
323 (Supplemental Table 6). Replicate 1 of sample S-F3-N failed to sequence and no reads were  
324 generated; nevertheless, the other replicate generated 87,818 reads with ~1,500 bp length. In  
325 contrast, sample R-F1-E sequenced in two repeats validly sequenced 1,27,647 and 5,57,290  
326 reads ranging from 1,500 to 1,600 bp length, and the comparative analyses between replicates at  
327 the genus and species levels were comparable, comprising almost similar bacterial composition  
328 (Supplementary Figure 4). Therefore, for further comparative analysis, reads from one  
329 sequencing replicate of sample R-F1-E were used.

330 **Taxonomic classification at phylum, genus, and species levels.** At the phylum level, sample  
331 R-F1-E showed Bacteroidetes and Proteobacteria with relative abundance of >1%, while sample  
332 S-F1-E was dominated with 3 phyla- Bacteroidetes, Proteobacteria and Verrucomicrobia (Figure  
333 2). Classification at the genus level uncovered a total of 11 and 6 genera from samples R-F1-E  
334 and S-F3-N, respectively, with relative abundance >1% (Figure 2). The most abundant genus  
335 classified in both the samples was *Limnohabitans* belonging to the family Comamonadaceae.  
336 Within the family Comamonadaceae, the genera *Arcobacter*, *Curvibacter*, *Limnohabitans*, and  
337 *Rhodoferax* were identified in both samples, with an additional two genera—*Hydrogenophaga*  
338 and *Pelomonas*—exclusively in sample R-F1-E with >1% relative abundance. Furthermore,  
339 genus *Aquirufa* was recognized in sample S-F3-N with relative abundance of 25.71%, while  
340 8.86% remained in sample R-F1-E. The bacterial genera classified with relative abundance of  
341 <1% in total comprised 33.21% and 22.41% of bacterial community in sample R-F1-E and S-F3-  
342 N, respectively.

343 At the species level, 16 and 11 species were classified from samples R-F1-E and S-F3-N,  
344 respectively, with >1% relative abundance (Figure 2F). Samples R-F1-E and S-F3-N were  
345 dominated with species *Limnohabitans parvus* II-B4 and *Aquirufa anthreingensis*, respectively.  
346 Four species belonging to genus *Limnohabitans*—*L. australis*, *L. curvus*, *L. parvus* II-B4, and *L.*  
347 *planktonicus*—were identified in both the samples with variable abundance. Furthermore,  
348 73.38% and 72.06% of the bacterial diversity was composed of the bacterial population  
349 identified with relative abundance >1% in samples R-F1-E and S-F3-N, respectively. Full length  
350 amplicon reads that remained unclassified in samples R-F1-E and S-F3-N were 1.1 and 0.82% of  
351 the total analyzed reads, respectively.

#### 352 **Taxonomic classification comparison with short and long reads 16S rRNA-based data sets.**

353 Short and full length 16S rRNA amplicon reads were obtained using Illumina iSeq100 and  
354 Oxford Nanopore MinION sequencers. The taxonomic classification results at phylum, genus  
355 and species levels were compared with different input reads (10K, 20K, 30K, 40K, and 50K),  
356 randomly extracted from total obtained valid reads—for samples R-F1-E and S-F3-N (Figure 3).  
357 At phylum level classification, Illumina sequenced samples R-F1-E and S-F3-N identified a  
358 greater number of phyla than MinION at different input reads (Figure 3A). In sample R-F1-E, an  
359 increase in the number of identified phyla was observed from 10K to 20K reads sequenced using  
360 Illumina (25 and 28, respectively) and MinION (13 and 15, respectively). With an increase in  
361 Illumina and MinION reads from 30K to 50K, a uniform number of phyla were identified, except  
362 for Illumina sequenced input read of 50K (Figure 3A). A similar trend in the number of  
363 identified phyla was observed in sample S-F3-N, with an exception that uniformity in the  
364 number of identified phyla (31) was observed in Illumina sequenced reads from 30K to 50K  
365 (Figure 3B). However, MinION sequenced input reads of 30K to 40K identified 16 phyla with a



366 slight increase to 18 at 50K reads. Proteobacteria and Bacteroidetes were two major phyla  
367 identified in sample R-F1-E with >1% relative abundance, sequenced using both the techniques  
368 (Figure 3A). However, in sample S-F3-N, total 5- Actinobacteria, Bacteroidetes,  
369 Parcubacteria\_OD1, Proteobacteria and, Verrucomicrobia and 3- Bacteroidetes, Proteobacteria  
370 and Verrucomicrobia were identified with relative abundance >1% from Illumina and MinION  
371 sequenced reads, respectively, at different input reads (Figure 3B). The number of genera and the  
372 genera classified with relative abundance >1% and remaining unclassified reads formed a  
373 uniform trend using both short- and long-amplicons at different input reads. The number of  
374 genera identified using Illumina input reads from 10K to 50K ranged from 339 to 675 for sample  
375 R-F1-E, whereas ranged from 338 to 561 for sample S-F3-N (Figure 3C and 3D). In contrast,  
376 MinION sequenced reads identified comparatively fewer genera ranging from 311 to 627 and  
377 265 to 581 for sample R-F1-E and S-F3-N, respectively (Figure 3C and 3D). However, most  
378 genera classified using short amplicon reads were identified with low confidence values against  
379 the database, whereas long amplicon reads had comparatively better resolution for classified  
380 genera (Figure 3C and 3D). For both samples, the unclassified reads were fewer than 8% and 2%  
381 of the total input reads using short and long amplicon reads, respectively.

382 The number of species classified using long amplicon reads was higher than when using short  
383 amplicon reads (Figure 3). The number of identified species ranged from 619 to 1,421 and 551 to  
384 1,306 for MinION sequenced samples R-F1-E and S-F3-N, respectively (Figure 3E and 3F).  
385 Whereas Illumina sequenced samples R-F1-E and S-F3-N identified species ranging from 464 to  
386 1089 and from 408 to 722, respectively (Figure 3E and 3F). At the species level classification,  
387 ~50% and ~33% of the total input reads remained unclassified using short amplicon reads for  
388 sample R-F1-E and S-F3-N, respectively, whereas long amplicon reads were classified with high

389 accuracy comprising >98% classified reads (Figure 3E and 3F). In sample R-F1-E and S-F3-N,  
390 the species identified with relative abundance >1%, utilizing long amplicon reads at different  
391 inputs comprehends >70% of the identified bacterial microbiota.

392 In term of relative abundance, almost similar abundance patterns were obtained with each  
393 technique when 10 – 50K reads were used as an input data—indicated that minimum input of  
394 10K reads from either Illumina iSeq100 or Oxford Nanopore MinION, can provide similar  
395 resolution with 5 times more input reads. However, with respect to the number of classified  
396 phyla, Illumina provided better outcomes compared to Oxford Nanopore, and there was no  
397 dramatic increase in number of phyla when the input reads were increased from 10K to 50K by  
398 either sequencing technology (Figure 3A and 3B). The analyses indicated that Oxford Nanopore  
399 MinION is a better choice for higher resolution at genus and species levels (Figure 3C-3F). To  
400 identify number of genera or species, it is important to include higher number of reads (~>20K).

401 **Shotgun metagenome analysis.** A total of 5,61,183 and 4,91,726 non-redundant genes were  
402 identified from sample R-F1-E and S-F3-N, respectively, while sharing 1,24,661 (12%) unigenes  
403 between both. Despite having close microbial association indicated by PCoA analysis, the  
404 samples R-F1-E and S-F3-N were distinctively differentiated based on unique genes composition  
405 of 78% and 75%, respectively.

406 **Taxonomic classification of metagenomics (shotgun) data.** According to the obtained  
407 abundance table of each taxonomic level, the bar plots were plotted for the top 10 classified  
408 phyla, genera, and species (Figure 2G-2I). At the phylum level, the most abundant phyla, in both  
409 the samples, were Proteobacteria, followed by Bacteroidetes with relative abundance >1%.  
410 Additionally, Actinobacteria was also classified in sample S-F3-N with >1% relative abundance,  
411 differentiating this from sample R-F1-E in which seven genera—*Curvibacter*, *Limnohabitans*,

412 *Flavobacterium*, *Pelomonas*, *Rhodobacter*, *Pseudarcicella*, and *Novosphingobium*—were  
413 classified with more than 1% relative abundance, whereas only 5 genera—*Limnohabitans*,  
414 *Flavobacterium*, *Rhodoluna*, *Pseudarcicella*, and *Novosphingobium*—were classified in sample  
415 S-F3-N. Species level classification revealed 10 species with relative abundance of >1% from  
416 both the samples. A high percentage of “others” in the metagenomic analysis could result from  
417 an incomplete database.

418 “Others” representing the relative abundance of the reads that remain unclassified and classified  
419 with relative abundance of <1% was higher at phylum, genus, and species level classification for  
420 both the samples sequenced using Illumina NovaSeq (shotgun reads) than Illumina iSeq100 and  
421 Oxford Nanopore MinION (Figure 2). Sample R-F1-E represented 40.12%, 69.88%, and 86.12%  
422 of reads as “others” at phylum, genus, and species level classification, respectively. Sample S-  
423 F3-N at phylum, genus, and species level represented 46.25%, 69.04%, and 89.53%,  
424 respectively, as “others”.

425 **Functional profiling of active bacterial community.** For better insight into the physiology of a  
426 bacterial community, the assembled metagenomic protein coding sequences were mapped  
427 against three functional databases—eggNOG, KEGG, and CAZy (Supplemental Figure 4). Both  
428 samples (R-F1-E and S-F3-N) revealed similarity in annotated gene function profiles and were  
429 clustered together.

430 Annotation based on eggNOG database revealed (Supplementary Fig. 5A-B) that highest number  
431 genes in sample R-F1-E were associated with inorganic ion, amino acid, carbohydrate,  
432 nucleotide, and lipid transport and metabolism, cell motility, and transcription with the relative  
433 abundance >1% for each function. Whereas in sample S-F3-N, the maximum number of genes  
434 were associated with 7 functions and having >1% relative abundance—replication,

435 recombination, and repair, translation, ribosomal structure, and biogenesis, nucleotide transport  
436 and metabolism, cell wall/membrane/envelope biogenesis, post-translational modification,  
437 protein turnover, chaperons, coenzyme transport and metabolism, and energy production and  
438 conversion.

439 Most of the genes represented in the KEGG pathway analysis were associated with metabolic  
440 pathways (Supplemental Fig. 4C-D), and particularly dominant in the category of amino acid  
441 transport and metabolism having 28,924 and 19,900 associated genes in samples R-F1-E and S-  
442 F3-N, respectively. Statistically differential features of functional categories based on KEGG  
443 analysis between the two samples were analyzed using STAMP, indicating metabolism, genetic  
444 information processing, human diseases, and organismal system dominant in sample S-F3-N,  
445 whereas environmental information and cellular processing were enriched in sample R-F1-E  
446 (Supplemental Fig. 4D).

447 As per CAZy database-based analysis, glycoside hydrolases (GH) associated genes were most  
448 abundant with the relative abundance of 49.33 and 51.87% in sample R-F1-E and S-F3-N,  
449 respectively, followed by glycosyl transferase (GT), carbohydrate-binding modules (CBM),  
450 carbohydrate esterases (CE), auxiliary activities (AA), polysaccharide lyases (PL)  
451 (Supplementary Fig. 5E). STAMP analysis revealed GH was significantly different with a q-  
452 value of  $4.37e-3$  and was enriched in sample S-F3-N (Supplementary Fig. 5F). Whereas glycosyl  
453 transferase (GT), carbohydrate-binding modules (CBM), carbohydrate esterases (CE), auxiliary  
454 activities (AA), polysaccharide lyases (PL) were higher in sample R-F1-E, with no significant  
455 differences observed among these functions.

456 **Occurrence, abundance, and diversity of ARGs.** To explore and compare the ARGs profile in  
457 sample R-F1-E and S-F3-N, all unique genes obtained from the samples were BLASTp against

458 the CARD database. This analysis revealed the presence of 83 and 62 ARGs in sample R-F1-E  
459 and S-F3-N, respectively (Figure 4A), while sharing 50 ARGs between each other with variable  
460 relative abundance (Figure 4B). *MexK*, a resistance nodulation cell division (RND) antibiotic  
461 efflux pump gene, was the most abundant ARG present in both the samples (Figure 4C).

462 Furthermore, the top 10 most abundant ARGs out of 95 ARGs, annotated collectively from both  
463 samples, were represented in Circos for observing overall proportion and distribution of the  
464 resistance genes in both samples (Figure 4C). The top 10 ARGs were: *mexK* (multidrug  
465 resistance gene), *ugd* (peptide resistance gene), *rpoB2* (rifamycin resistance gene), *kdpE*  
466 (aminoglycoside resistance gene), *golS* (multidrug resistance gene), *dfrA3* (diaminopyrimidine  
467 resistance gene), *mtrD* (macrolide resistance gene), *Streptomyces rishiriensis parY* mutant  
468 conferring resistance to aminocoumarin (*Sris\_parY\_AMU*) (aminocoumarin resistance gene),  
469 *Bifidobacterium ileS* conferring resistance to mupirocin (*Bbif\_ileS\_MUP*) (mupirocin resistance  
470 gene), and *mtrA* (macrolide resistance gene). The relative abundance of gene *ugd*, *kdpE*, *golS*,  
471 and *dfrA3* was higher in sample R-F1-E, whereas *mexK*, *rpoB2*, *Bbif\_ileS\_MUP*, and *mtrA* were  
472 relatively higher in sample S-F3-N. Interestingly, ARG *mtrD* and *Sris\_parY\_AMU* were only  
473 conferred to sample R-F1-E and S-F3-N, respectively.

474 An additional analysis was performed to reveal the dominant bacterial phyla possessing the most  
475 ARG genes with different associated resistance mechanisms. The most abundant resistant  
476 mechanism associated with the annotated ARGs corresponded to RND antibiotic efflux pump,  
477 followed by major facilitator superfamily (MFS) antibiotic efflux pump, antibiotic target  
478 alteration (pmr phosphoethanolamine transferase), protein and two component regulatory system  
479 modulating antibiotic efflux (*kdpE*), antibiotic target replacement (*DfrA42\_TMP*), and ABC

480 antibiotic efflux pump. These potential antibiotic mechanisms were associated with the ARG that  
481 were affiliated with phyla Proteobacteria (Supplementary Fig. 6).

## 482 **DISCUSSION**

483 Our study highlighted significant differences and similarities in the bacterial communities of  
484 different irrigation water systems from different geographical locations (North, West, and East)  
485 on Oahu, Hawaii. Comparative assessment of bacterial communities between samples showed  
486 distinctive discriminations based on type of water system and geographical location. It is striking  
487 to note that natural stream and associated field water samples were dominated by Proteobacteria,  
488 regardless of their geographical locations—there was a close bacterial association between the  
489 samples based on beta diversity analysis. These outcomes agreed with the previous studies  
490 conducted in Brazil (36) and Tokyo (37), which revealed a dominance of Proteobacteria in river  
491 water. Samples collected from North Oahu showed close microbial association regardless of  
492 different water systems, indicating an influence of geographical locations (topography, water  
493 bodies, climatic conditions, natural vegetation etc.) in composing the microbial consortia (38).  
494 Field water samples R-F1-E and S-F3-N were clustered based on the microbiota despite being  
495 irrigated by different irrigation systems (spring and stream) and different geographical regions  
496 (North and East), which prompted us to uncover the complex and diverse microbiota at a higher  
497 taxonomic level (Figure 1). The short amplicon reads generated from V3-V4 gene region of 16S  
498 rRNA using Illumina iSeq100 was able to detect phyla with high accuracy in addition to  
499 classification of most dominant genera as well. However, some genera within the family were  
500 not classified with high confidence value and more than 50% of the valid reads were  
501 unclassified, indicating a limitation of short amplicon reads for high resolution and accuracy of  
502 classification. A study (39) designed to uncover and compare the microbial consortia of indoor

503 dust sequenced using Illumina and Nanopore MinION revealed significant differences in  
504 microbial composition at genus and species levels, with better resolution provided by MinION  
505 sequenced reads. Therefore, to investigate the microbiota of sample R-F1-E and S-F3-N at a  
506 higher taxonomic level with better resolution, full length 16S rRNA gene region was sequenced  
507 using Oxford Nanopore MinION and analyzed. Full length amplicon analysis revealed high  
508 abundance of the genus *Limnohabitans* that includes planktonic bacteria and classified other  
509 dominant genera within family Comamonadaceae that remained unclassified using short  
510 amplicon reads. All the four species within the genus *Limnohabitans* (40, 41) were successfully  
511 classified with >1% relative abundance. Additionally, genus *Aquirufa*, a freshwater bacterium,  
512 was identified in spring and stream field water with relative abundance >1% and *Aquirufa*  
513 *antheringensis* was the dominant species in spring field water. Another study (42) also found the  
514 higher abundance of *A. antheringensis* in fresh water. The resolution obtained for genus and  
515 species level classification was better using long amplicon reads with <2% valid reads that  
516 remained unclassified (Figure 2).

517 Furthermore, we compared the performance of long reads (~1,500bp) obtained from Oxford  
518 Nanopore MinION with short reads (~300bp) obtained from Illumina iSeq100 to assess bacterial  
519 taxonomic classification at phylum, genus, and species levels with different numbers of input  
520 reads. Results from this experimental study showed uniform trends in classification at phylum,  
521 genus, and species levels for samples, R-F1-E and S-F3-N, at 10K, 20K, 30K, 40K, and 50K  
522 input reads (Figure 3). However, when long- and short-read outcomes were compared,  
523 dissimilarities in relative abundance at all three taxonomic levels were observed (Figure 3).  
524 Short-read-based taxonomic analysis provided the most comprehensive classification at the  
525 phylum level compared to 16S rRNA full length reads and shotgun metagenome data (Figures 2-

526 3). However, 16S rRNA full length reads clearly illustrated its advantage for classification at  
527 genus and species levels (Figures 2-3). In a study (43) proposed Oxford Nanopore MinION as a  
528 low cost and rapid technology for revealing microbial communities with higher resolution at the  
529 species level which ultimately aids in identifying bacteria potentially pathogenic to human  
530 health. In our study, with a high number of unclassified reads at phylum [39.52% (R-F1-E);  
531 45.82% (S-F3-N)], genus [68.04% (R-F1-E); 68.35% (S-F3-N)] and, species [85.37% (R-F1-E);  
532 89.17% (S-F3-N)] levels, we have not observed any advantages of using shotgun metagenome  
533 data for taxonomic classification (Figure 2)—this could be due to the limited and incomplete  
534 annotated metagenomic and bacterial genome databases currently available (44). With the  
535 advancement and improvement in the Nanopore MinION technology, this efficient, cost-  
536 effective, and robust technology can be employed for on-field microbiome study of  
537 environmental samples with minimum data requirements (45).

538 The environmental samples consist of complex and diverse microbiota which are better resolved  
539 in terms of predication of microbial community's functions. This can be achieved using shotgun  
540 metagenomic sequencing with advanced next generation sequencing technologies that generates  
541 enormous amounts of genomic data (46). However, due to different sequencing protocols and  
542 annotated databases, metagenome analysis and 16S rRNA gene sequencing cannot provide an  
543 identical taxonomic classification, as observed in our study and in (47). Metagenomic functional  
544 analysis revealed the presence of 78% and 75% of unique genes in sample R-F1-E and S-F3-N,  
545 respectively, while only 12% of the genes were shared between both the samples, but  
546 interestingly, were annotated for comparable gene functional profiles (Supplementary Fig. 4).  
547 The relatively high abundance of genes was related to metabolism of amino acids, nucleotides,  
548 carbohydrates, coenzymes, lipids, and inorganic ion metabolism and transport. 'Amino acid



549 metabolism' was enriched in both the samples, which may be due to fertilizer residues that  
550 provide a suitable living environment for microbiota that use amino acids. Additionally,  
551 environmental samples consist of diverse and abundant complex mixtures of carbohydrates  
552 requiring different enzymes for metabolism, mainly supported by glycoside hydrolases (GH)  
553 (48). In our study, GH were the most abundant and significantly different among all the other  
554 identified enzymes in both samples (Figure 4E and 4F). This enzyme assists in the enzymatic  
555 processing of carbohydrate, ultimately contributing to functioning of an ecosystem, global  
556 carbon cycling. The metagenomic data also revealed the prevalence of a variety of ARGs in both  
557 the samples. The ubiquity of ARGs in the environmental sample is an emerging concern. A study  
558 (49) documented the prevalence of ARGs in irrigation ditch water and urban/agriculturally  
559 impacted river sediments leading to the potential spread of ARGs to or from humans. From 95  
560 identified ARGs, only 50 genes were shared between both the samples with variable abundance  
561 depending on the microbial consortia and their genome compositions (Figure 4)—the genomic  
562 composition can be altered through horizontal gene transfer from environment or other bacteria  
563 mediated by mobile genetic elements such as plasmids, transposons, bacteriophages, insertion  
564 sequences and integrons (50, 51). The most abundant ARG in both the samples was *MexK*, a  
565 resistance nodulation cell division (RND) antibiotic efflux pump gene which can transport  
566 multiple classes of antimicrobials, contributing to multidrug resistance (52). Therefore,  
567 uncovering the bacterial components, functional analysis, and investigation of the ARGs will  
568 resolve the microbial complexity and help to formulate better disease management strategies for  
569 water transmitted pathogens.

## 570 **CONCLUSIONS**

571 The bacterial consortia found in different water source of taro irrigation across the island of  
572 Oahu, Hawaii revealed that Proteobacteria is the most dominant phyla, except for a few samples  
573 from storage tank and spring water. The most reliable and comprehensive taxonomic  
574 classifications at phylum and genus/species levels were observed with input reads obtained from  
575 Illumina and Oxford Nanopore, respectively. The lack of robust and comprehensive annotated  
576 metagenome and bacterial genome databases contributed to inconclusive classification using  
577 shotgun metagenome reads, particularly at genus and species levels. However, metagenomic data  
578 contributed to the understanding of gene distribution of microbiomes and their functions,  
579 including ARGs, associated with different microbial consortia. This study provided some  
580 appropriate sequencing platforms and pipelines to study irrigation water microbiome.

581

## 582 **ACKNOWLEDGEMENTS**

583 This research was supported in parts by NIGMS of the National Institutes of Health  
584 (P20GM125508), USDA National Institute of Food and Agriculture, and College of Tropical  
585 Agriculture and Human Resources managed Hatch project (9038H).

586

## 587 **Conflict of Interest**

588 Authors declare no conflict of interest exist.

589

## 590 **REFERENCES**

- 591 1. Hintz LD, Boyer RR, Ponder MA, Williams RC, Rideout SL. 2010. Recovery of *Salmonella enterica*  
592 Newport Introduced through Irrigation Water from Tomato (*Lycopersicon esculentum*) Fruit,  
593 Roots, Stems, and Leaves. *HortScience* 45:675–678.
- 594 2. Redekar NR, Eberhart JL, Parke JL. 2019. Diversity of *Phytophthora*, *Pythium*, and *Phytophthium*  
595 Species in Recycled Irrigation Water in a Container Nursery. *Phytobiomes Journal* 3:31–45.
- 596 3. Uyttendaele M, Jaykus L-A, Amoah P, Chiodini A, Cunliffe D, Jacxsens L, Holvoet K, Korsten L, Lau  
597 M, McClure P, Medema G, Sampers I, Rao Jasti P. 2015. Microbial Hazards in Irrigation Water:  
598 Standards, Norms, and Testing to Manage Use of Water in Fresh Produce Primary Production.  
599 *Comprehensive Reviews in Food Science and Food Safety* 14:336–356.
- 600 4. Cevallos-Cevallos JM, Gu G, Richardson SM, Hu J, van BRUGGEN AHC. 2014. Survival of  
601 *Salmonella enterica* Typhimurium in Water Amended with Manure. *Journal of Food Protection*  
602 77:2035–2042.
- 603 5. Ravva SV, Sarreal CZ, Duffy B, Stanker LH. 2006. Survival of *Escherichia coli* O157:H7 in  
604 wastewater from dairy lagoons. *J Appl Microbiol* 101:891–902.
- 605 6. Van der Linden I, Cottyn B, Uyttendaele M, Vlaemyneck G, Maes M, Heyndrickx M. 2013. Long-  
606 term survival of *Escherichia coli* O157:H7 and *Salmonella enterica* on butterhead lettuce seeds,  
607 and their subsequent survival and growth on the seedlings. *Int J Food Microbiol* 161:214–219.
- 608 7. Cevallos-Cevallos J, Danyluk M, Gu G, Vallad G, van Bruggen A. 2012. Dispersal of *Salmonella*  
609 Typhimurium by Rain Splash onto Tomato Plants. *Journal of food protection* 75:472–9.
- 610 8. Paul PA, El-Allaf SM, Lipps PE, Madden LV. 2004. Rain Splash Dispersal of *Gibberella zeae* Within  
611 Wheat Canopies in Ohio. *Phytopathology* 94:1342–1349.

- 612 9. Gu G, Cevallos-Cevallos JM, van Bruggen AHC. 2013. Ingress of *Salmonella enterica* Typhimurium  
613 into tomato leaves through hydathodes. *PLoS One* 8:e53470.
- 614 10. Luczkiewicz A, Kotlarska E, Artichowicz W, Tarasewicz K, Fudala-Ksiazek S. 2015. Antimicrobial  
615 resistance of *Pseudomonas* spp. isolated from wastewater and wastewater-impacted marine  
616 coastal zone. *Environ Sci Pollut Res Int* 22:19823–19834.
- 617 11. Szczepanowski R, Linke B, Krahn I, Gartemann K-H, Gützkow T, Eichler W, Pühler A, Schlüter A.  
618 2009. Detection of 140 clinically relevant antibiotic-resistance genes in the plasmid  
619 metagenome of wastewater treatment plant bacteria showing reduced susceptibility to selected  
620 antibiotics. *Microbiology (Reading)* 155:2306–2319.
- 621 12. Zhang T, Li B. 2011. Occurrence, Transformation, and Fate of Antibiotics in Municipal  
622 Wastewater Treatment Plants. *Critical Reviews in Environmental Science and Technology*  
623 41:951–998.
- 624 13. Qin Q, Chen X, Zhuang J. 2015. The Fate and Impact of Pharmaceuticals and Personal Care  
625 Products in Agricultural Soils Irrigated With Reclaimed Water. *Critical Reviews in Environmental*  
626 *Science and Technology* 45:1379–1408.
- 627 14. Diaz PI, Dupuy AK, Abusleme L, Reese B, Obergfell C, Choquette L, Dongari-Bagtzoglou A,  
628 Peterson DE, Terzi E, Strausbaugh LD. 2012. Using high throughput sequencing to explore the  
629 biodiversity in oral bacterial communities. *Mol Oral Microbiol* 27:182–201.
- 630 15. Rinke C, Lee J, Nath N, Goudeau D, Thompson B, Poulton N, Dmitrieff E, Malmstrom R,  
631 Stepanauskas R, Woyke T. 2014. Obtaining genomes from uncultivated environmental  
632 microorganisms using FACS-based single-cell genomics. *Nat Protoc* 9:1038–1048.

- 633 16. Tringe SG, Hugenholtz P. 2008. A renaissance for the pioneering 16S rRNA gene. *Curr Opin*  
634 *Microbiol* 11:442–446.
- 635 17. Sanz-Martin I, Doolittle-Hall J, Teles RP, Patel M, Belibasakis GN, Hämmerle CHF, Jung RE, Teles  
636 FRF. 2017. Exploring the microbiome of healthy and diseased peri-implant sites using Illumina  
637 sequencing. *J Clin Periodontol* 44:1274–1284.
- 638 18. Goodwin S, McPherson JD, McCombie WR. 2016. Coming of age: ten years of next-generation  
639 sequencing technologies. 6. *Nat Rev Genet* 17:333–351.
- 640 19. Matsuo Y, Komiya S, Yasumizu Y, Yasuoka Y, Mizushima K, Takagi T, Kryukov K, Fukuda A,  
641 Morimoto Y, Naito Y, Okada H, Bono H, Nakagawa S, Hirota K. 2021. Full-length 16S rRNA gene  
642 amplicon analysis of human gut microbiota using MinION™ nanopore sequencing confers  
643 species-level resolution. *BMC Microbiology* 21:35.
- 644 20. Heikema AP, Horst-Kreft D, Boers SA, Jansen R, Hiltemann SD, de Koning W, Kraaij R, de Ridder  
645 MAJ, van Houten CB, Bont LJ, Stubbs AP, Hays JP. 2020. Comparison of Illumina versus Nanopore  
646 16S rRNA Gene Sequencing of the Human Nasal Microbiota. 9. *Genes* 11:1105.
- 647 21. Laver T, Harrison J, O’Neill PA, Moore K, Farbos A, Paszkiewicz K, Studholme DJ. 2015. Assessing  
648 the performance of the Oxford Nanopore Technologies MinION. *Biomolecular Detection and*  
649 *Quantification* 3:1–8.
- 650 22. Peng X, Wilken SE, Lankiewicz TS, Gilmore SP, Brown JL, Henske JK, Swift CL, Salamov A, Barry K,  
651 Grigoriev IV, Theodorou MK, Valentine DL, O’Malley MA. 2021. Genomic and functional analyses  
652 of fungal and bacterial consortia that enable lignocellulose breakdown in goat gut microbiomes.  
653 4. *Nat Microbiol* 6:499–511.

- 654 23. Schmieder R, Edwards R. 2012. Insights into antibiotic resistance through metagenomic  
655 approaches. *Future Microbiol* 7:73–89.
- 656 24. Xu J, Xu Y, Wang H, Guo C, Qiu H, He Y, Zhang Y, Li X, Meng W. 2015. Occurrence of antibiotics  
657 and antibiotic resistance genes in a sewage treatment plant and its effluent-receiving river.  
658 *Chemosphere* 119:1379–1385.
- 659 25. Herlemann DP, Labrenz M, Jürgens K, Bertilsson S, Waniek JJ, Andersson AF. 2011. Transitions in  
660 bacterial communities along the 2000 km salinity gradient of the Baltic Sea. *10. ISME J* 5:1571–  
661 1579.
- 662 26. Yoon S-H, Ha S-M, Kwon S, Lim J, Kim Y, Seo H, Chun J. 2017. Introducing EzBioCloud: a  
663 taxonomically united database of 16S rRNA gene sequences and whole-genome assemblies. *Int J*  
664 *Syst Evol Microbiol* 67:1613–1617.
- 665 27. Masella AP, Bartram AK, Truszkowski JM, Brown DG, Neufeld JD. 2012. PANDAseq: paired-end  
666 assembler for illumina sequences. *BMC Bioinformatics* 13:31.
- 667 28. Edgar RC, Haas BJ, Clemente JC, Quince C, Knight R. 2011. UCHIME improves sensitivity and  
668 speed of chimera detection. *Bioinformatics* 27:2194–2200.
- 669 29. Li W, Godzik A. 2006. Cd-hit: a fast program for clustering and comparing large sets of protein or  
670 nucleotide sequences. *Bioinformatics* 22:1658–1659.
- 671 30. Li D, Liu C-M, Luo R, Sadakane K, Lam T-W. 2015. MEGAHIT: an ultra-fast single-node solution for  
672 large and complex metagenomics assembly via succinct de Bruijn graph. *Bioinformatics*  
673 31:1674–1676.
- 674 31. Zhu W, Lomsadze A, Borodovsky M. 2010. Ab initio gene identification in metagenomic  
675 sequences. *Nucleic Acids Research* 38:e132.

- 676 32. Fu L, Niu B, Zhu Z, Wu S, Li W. 2012. CD-HIT: accelerated for clustering the next-generation  
677 sequencing data. *Bioinformatics* 28:3150–3152.
- 678 33. Gu S, Fang L, Xu X. 2013. Using SOAPaligner for Short Reads Alignment. *Current Protocols in*  
679 *Bioinformatics* 44:11.11.1-11.11.17.
- 680 34. Buchfink B, Xie C, Huson DH. 2015. Fast and sensitive protein alignment using DIAMOND. 1. *Nat*  
681 *Methods* 12:59–60.
- 682 35. Parks DH, Tyson GW, Hugenholtz P, Beiko RG. 2014. STAMP: statistical analysis of taxonomic and  
683 functional profiles. *Bioinformatics* 30:3123–3124.
- 684 36. Godoy RG, Marcondes MA, Pessôa R, Nascimento A, Victor JR, Duarte AJ da S, Clissa PB,  
685 Sanabani SS. 2020. Bacterial community composition and potential pathogens along the  
686 Pinheiros River in the southeast of Brazil. 1. *Sci Rep* 10:9331.
- 687 37. Reza MdS, Mizusawa N, Kumano A, Oikawa C, Ouchi D, Kobiyama A, Yamada Y, Ikeda Y, Ikeda D,  
688 Ikeo K, Sato S, Ogata T, Kudo T, Jimbo M, Yasumoto K, Yoshitake K, Watabe S. 2018.  
689 Metagenomic analysis using 16S ribosomal RNA genes of a bacterial community in an urban  
690 stream, the Tama River, Tokyo. *Fish Sci* 84:563–577.
- 691 38. Aguilar MO, Gobbi A, Browne PD, Ellegaard-Jensen L, Hansen LH, Semorile L, Pistorio M. 2020.  
692 Influence of vintage, geographic location and cultivar on the structure of microbial communities  
693 associated with the grapevine rhizosphere in vineyards of San Juan Province, Argentina. *PLOS*  
694 *ONE* 15:e0243848.

- 695 39. Nygaard AB, Tunsjø HS, Meisal R, Charnock C. 2020. A preliminary study on the potential of  
696 Nanopore MinION and Illumina MiSeq 16S rRNA gene sequencing to characterize building-dust  
697 microbiomes. *Sci Rep* 10:3209.
- 698 40. Hahn MW, Kasalický V, Jezbera J, Brandt U, Šimek K. 2010. *Limnohabitans australis* sp. nov.,  
699 isolated from a freshwater pond, and emended description of the genus *Limnohabitans*. *Int J*  
700 *Syst Evol Microbiol* 60:2946–2950.
- 701 41. Kasalický V, Jezbera J, Šimek K, Hahn MW. 2010. *Limnohabitans planktonicus* sp. nov., and  
702 *Limnohabitans parvus* sp. nov., two novel planktonic Betaproteobacteria isolated from a  
703 freshwater reservoir. *Int J Syst Evol Microbiol* 60:2710–2714.
- 704 42. Pitt A, Schmidt J, Koll U, Hahn MW. 2019. *Aquirufa antheringensis* gen. nov., sp. nov. and  
705 *Aquirufa nivalisilvae* sp. nov., representing a new genus of widespread freshwater bacteria. *Int J*  
706 *Syst Evol Microbiol* 69:2739–2749.
- 707 43. Komiya S, Matsuo Y, Nakagawa S, Morimoto Y, Kryukov K, Okada H, Hirota K. 2022. MinION, a  
708 portable long-read sequencer, enables rapid vaginal microbiota analysis in a clinical setting. *BMC*  
709 *Med Genomics* 15:68.
- 710 44. Pignatelli M, Aparicio G, Blanquer I, Hernández V, Moya A, Tamames J. 2008. Metagenomics  
711 reveals our incomplete knowledge of global diversity. *Bioinformatics* 24:2124–2125.
- 712 45. Goordial J, Altshuler I, Hindson K, Chan-Yam K, Marcoletas E, Whyte LG. 2017. In Situ Field  
713 Sequencing and Life Detection in Remote (79°26'N) Canadian High Arctic Permafrost Ice Wedge  
714 Microbial Communities. *Frontiers in Microbiology* 8.



- 715 46. Meneghine AK, Nielsen S, Varani AM, Thomas T, Alves LMC. 2017. Metagenomic analysis of soil  
716 and freshwater from zoo agricultural area with organic fertilization. *PLOS ONE* 12:e0190178.
- 717 47. Peterson D, Bonham KS, Rowland S, Pattanayak CW, RESONANCE Consortium, Klepac-Ceraj V,  
718 Deoni SCL, D'Sa V, Bruchhage M, Volpe A, Beauchemin J, Wallace C, Rogers J, Cano R, Fernandes  
719 J, Walsh E, Rhodes B, Huentelman M, Lewis C, De Both MD, Naymik MA, Carnell S, Jansen E,  
720 Sadler JR, Thapaliya G, Bonham K, LeBourgeois M, Mueller HG, Wang J-L, Zhu C, Chen Y, Braun J.  
721 2021. Comparative Analysis of 16S rRNA Gene and Metagenome Sequencing in Pediatric Gut  
722 Microbiomes. *Frontiers in Microbiology* 12.
- 723 48. Berlemont R, Martiny AC. 2016. Glycoside Hydrolases across Environmental Microbial  
724 Communities. *PLOS Computational Biology* 12:e1005300.
- 725 49. Pruden A, Pei R, Storteboom H, Carlson KH. 2006. Antibiotic resistance genes as emerging  
726 contaminants: studies in northern Colorado. *Environ Sci Technol* 40:7445–7450.
- 727 50. Rizzo L, Manaia C, Merlin C, Schwartz T, Dagot C, Ploy MC, Michael I, Fatta-Kassinos D. 2013.  
728 Urban wastewater treatment plants as hotspots for antibiotic resistant bacteria and genes  
729 spread into the environment: a review. *Sci Total Environ* 447:345–360.
- 730 51. Stalder T, Barraud O, Casellas M, Dagot C, Ploy M-C. 2012. Integron involvement in  
731 environmental spread of antibiotic resistance. *Front Microbiol* 3:119.
- 732 52. Colclough AL, Alav I, Whittle EE, Pugh HL, Darby EM, Legood SW, McNeil HE, Blair JM. 2020. RND  
733 efflux pumps in Gram-negative bacteria; regulation, structure and role in antibiotic resistance.  
734 *Future Microbiol* 15:143–157.

735 **LEGENDS**

736 **Figure 1.** The distribution heatmap of bacterial **A)** phylum and **B)** genus detected with relative  
737 abundance >1% among all the water samples sequenced using Illumina iSeq100, an amplicon  
738 sequencing platform and analyzed on EzBioCloud. The heatmap was generated using displayR.  
739 **C)** Principal Coordinate Analysis (PCoA) clustering based on Bray-Curtis dissimilarity index  
740 was analyzed at genus level bacterial structure to visualize the variation in bacterial community  
741 structures among 12 different samples, forming three distinctive clusters. Cluster 1 (blue circle)  
742 shows close microbial communities of river streams and associated field samples, irrespective of  
743 geographical location. Cluster 2 (red circle) represents close microbial association between  
744 samples collected from North Oahu. Cluster 3 (gray circle) shows close microbial association  
745 between sample R-F1-E and S-F3-N.

746 **Figure 2.** Comparison of sample R-F1-E and S-F3-N sequenced using Illumina iSeq100 (short  
747 amplicon reads), Oxford Nanopore MinION (long amplicon reads), and Illumina NovaSeq  
748 (shotgun reads) for the classification of phylum (**A**, **D**, and **G**, respectively), genus (**B**, **E**, and **H**,  
749 respectively), and species (**C**, **F**, and **I**, respectively) with relative abundance >1%. “Others” in  
750 the plots represents reads classified with <1% relative abundance and reads that remains  
751 unclassified.

752 **Figure 3.** Comparison of **A)** total number of classified phyla; **B)** the phyla classified with >1%  
753 relative abundance; **C)** total number of classified genera; **D)** genus classified with >1% relative  
754 abundance; **E)** total number of classified species; and **F)** species classified with >1% relative  
755 abundance from sample R-F1-E and S-F1-E sequenced using Illumina iSeq100 and Oxford  
756 Nanopore MinION at different input reads ranging from 10K to 50K. “ETC (<1%)” represents the  
757 classified reads at different taxonomic levels with <1% relative abundance, whereas

758 “unclassified” represents the relative abundance of the reads that remains unclassified at  
759 taxonomic level.

760 **Figure 4.** Distribution heatmap to represent **A)** comparison of relative abundance of a total 95  
761 Antibiotic resistance gene (ARG) profile obtained from sample R-F1-E and S-F3-N; **B)**  
762 comparison of relative abundance of 50 ARGs shared between sample R-F1-E and S-F3-N. All  
763 the unique genes from the metagenomic assembly were blastp against Comprehensive Antibiotic  
764 Resistance Database (CARD). **C)** Circos analysis displays the corresponding abundance  
765 relationship between samples and top 10 identified antibiotic resistance genes (ARGs) along with  
766 “others” representing remaining ARGs. Circle chart is divided into two parts. The right side of  
767 the circle is sample information, and the left side of the circle represents top 10 ARGs. Inner  
768 circle with different colors represents different ARGs. The scale represents the relative  
769 abundance, and the unit is ppm. The left part represents the sum of relative abundance of  
770 different samples for ARG, while the outer right circle represents the relative abundance of  
771 different ARGs in the samples.

772

## 773 **SUPPLEMENTARY FIGURES AND TABLES**

774 **Supplementary Figure 1.** Bar plot comparison of phylum level classification, classified with  
775 relative abundance of >1% in 11 samples- R-F1-E, R-S1-E, R-S2-W, R-F2-W, S-F3-N, R-S4-  
776 SE, R-F4-SE, R-S5-SE, R-F5-E, T-S6-N, and R-S7-N (Replicate 1 and Replicate 2) sequenced  
777 for short length amplicon using Illumina iSeq100 and analyzed on EzBioCloud platform.  
778 “Others” represents the reads classified with less than <1% relative abundance and remains  
779 unclassified in the classification against the database.

780 **Supplementary Figure 2.** Distribution heatmap of bacterial species classified with >1% relative  
781 abundance among all the 12 water samples—sequenced for V3-V4 region of 16S rRNA gene  
782 region using Illumina iSeq100 sequencing platform. The generated short amplicon reads were  
783 analyzed using EzBioCloud platform. The heatmap was generated using displayR.

784 **Supplementary Figure 3.** UPGMA (unweighted pair group method with arithmetic mean)  
785 clustering of water samples based on Bray-Curtis dissimilarity index at genus level. Samples  
786 were grouped in three distinctive clusters: Cluster 1 (R-F1-E and S-F3-N) irrespective of water  
787 system or geographical location, Cluster 2 (R-S1-E, R-F2-W, R-S2-W, R-F4-SE, R-S4-SE, R-  
788 F5-SE, and R-S5-SE) based on irrigation source and associated taro field water, and Cluster 3 (S-  
789 S3-N, T-S6-N, and R-S7-N) based on geographical location.

790 **Supplementary Figure 4.** Bar plot comparing the (A) genus and (B) species classified with  
791 relative abundance of >1% in sample R-F1-E (Replicate 1 and Replicate 2) sequenced for full  
792 length amplicon using Oxford Nanopore MinION and analyzed on EPI2ME platform. Input valid  
793 reads that were not classified to genus and species levels are represented as “Unclassified”, while  
794 “ETC (<1%)” represents the bacterial population identified with relative abundance of <1%.

795 **Supplementary Figure 5.** Comparison of samples R-F1-E and S-F3-N for relative abundance  
796 and statistical differences of annotated gene function profiles based on mapping of assembled  
797 metagenomic protein coding sequences to three databases: (A, B) non-supervised Orthologous  
798 groups (eggNOG), (C, D) Kyoto Encyclopedia of Genes and Genomes (KEGG), and (E, F)  
799 Carbohydrate-Active Enzymes Database (CAZy). Statistical analyses performed using STAMP v  
800 2.1.3 software, employing Fisher’s exact test with Newcombe-Wilson CI method and Benjamini-  
801 Hochberg FDR correction factors, and visualized using extended error bar plots.

802 **Supplementary Figure 6.** Circos analysis displays the corresponding abundance relationship  
803 between identified dominant phyla (Proteobacteria and Actinobacteria) along with “other”  
804 representation of identified phyla and associated resistance mechanism. Circle chart is divided  
805 into two parts. The right side of the circle is phyla information, and the left side of the circle is  
806 antibiotic resistance mechanisms. Inner circle with different colors represents different antibiotic  
807 resistance mechanisms. The scale represents the relative abundance, and the unit is ppm. The left  
808 part represents the sum of relative abundance of different phyla for resistance mechanisms, while  
809 the outer right circle vice versa.

810

811 **Supplemental Table 1.** List of samples sequenced in two replicates using Illumina iSeq100.  
812 Assigned barcodes with different combinations of i5 and i7 adapters.

813 **Supplemental Table 2.** List of valid reads with calculated average read length generated by  
814 sequencing of each barcode after quality filtration.

815 **Supplemental Table 3** Statistical analysis of the identified phyla among all the samples was  
816 determined using one-way ANOVA (single factor) with the least significant difference (LSD)  
817 test at  $\alpha=0.05$ .

818 **Supplemental Table 4.** Statistical analysis of identified genera among all the samples was  
819 determined using one-way ANOVA (single factor) with the least significant difference (LSD)  
820 test at  $\alpha=0.05$ .

821 **Supplementary Table 5.** Short length 16S rRNA reads classified to genus level, accounting for  
822 relative abundance <1% and remains unclassified are represented as “ETC (<1%)” and  
823 “Unclassified” based on the analysis performed using EzBioCloud.

824 **Supplemental Table 6.** Oxford Nanopore MinION 16S rRNA sequencing and analyses results  
825 of sample R-F1-E and S-F3-N. The EPI2ME Fastq16S pipeline was used for the analyses.

826

827

828

829

830

A

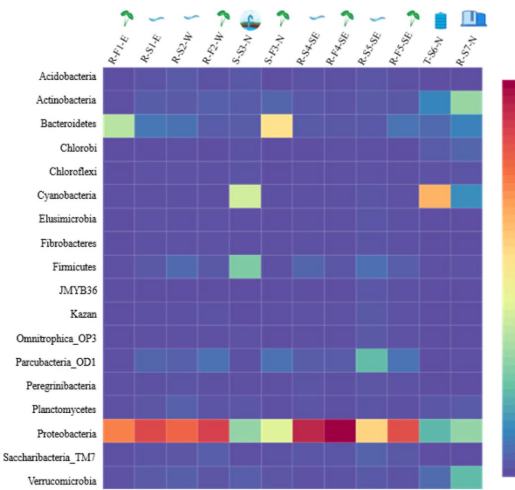

B

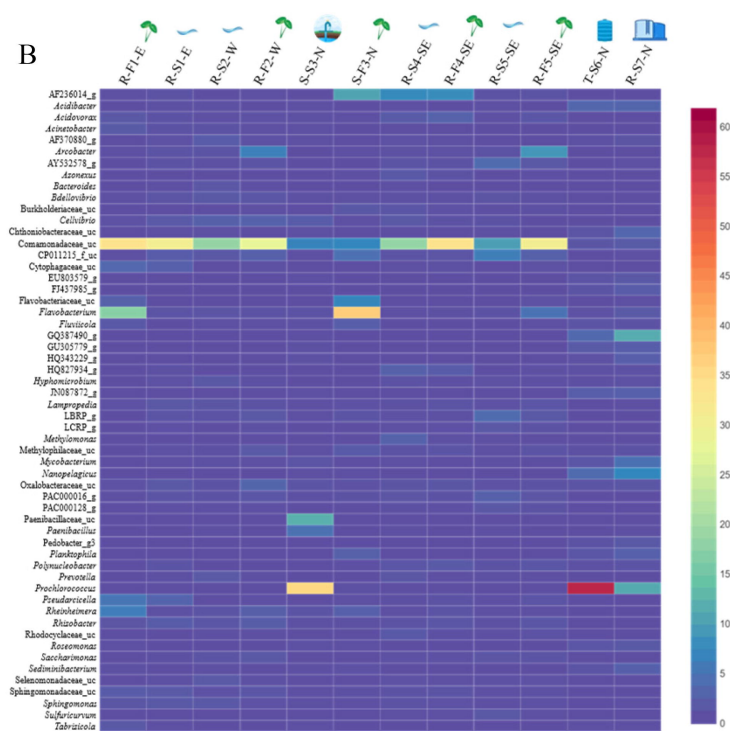

C

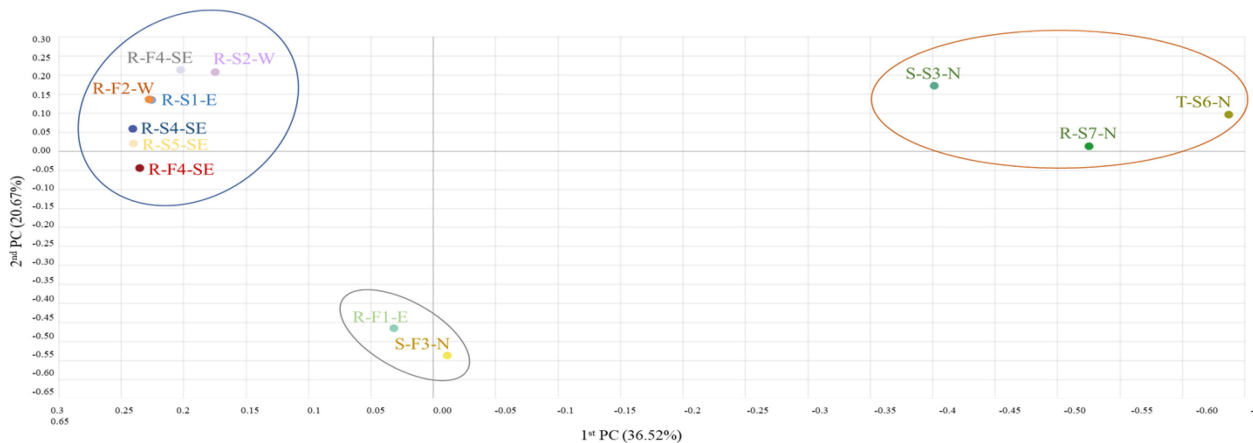

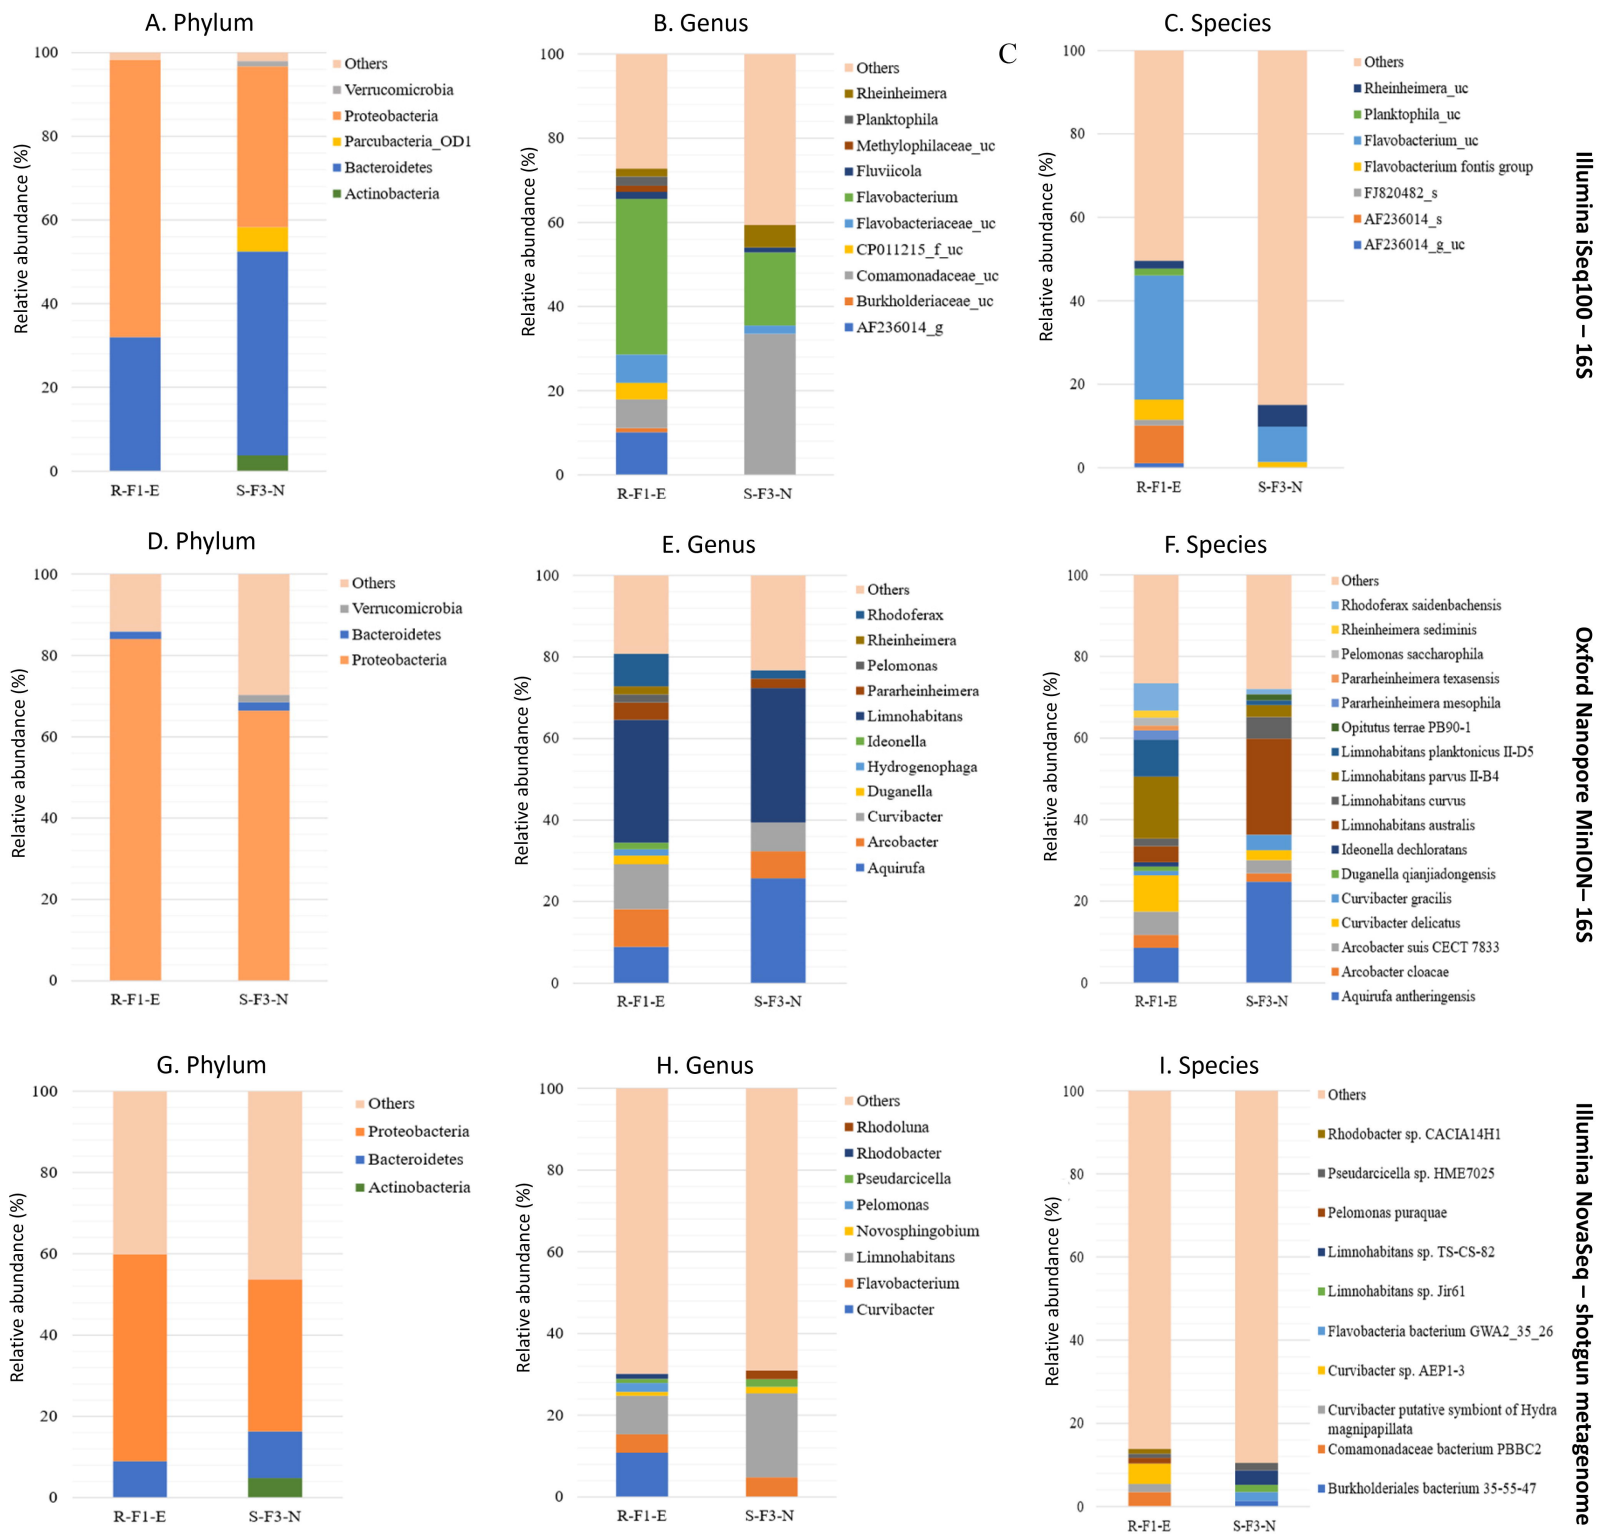



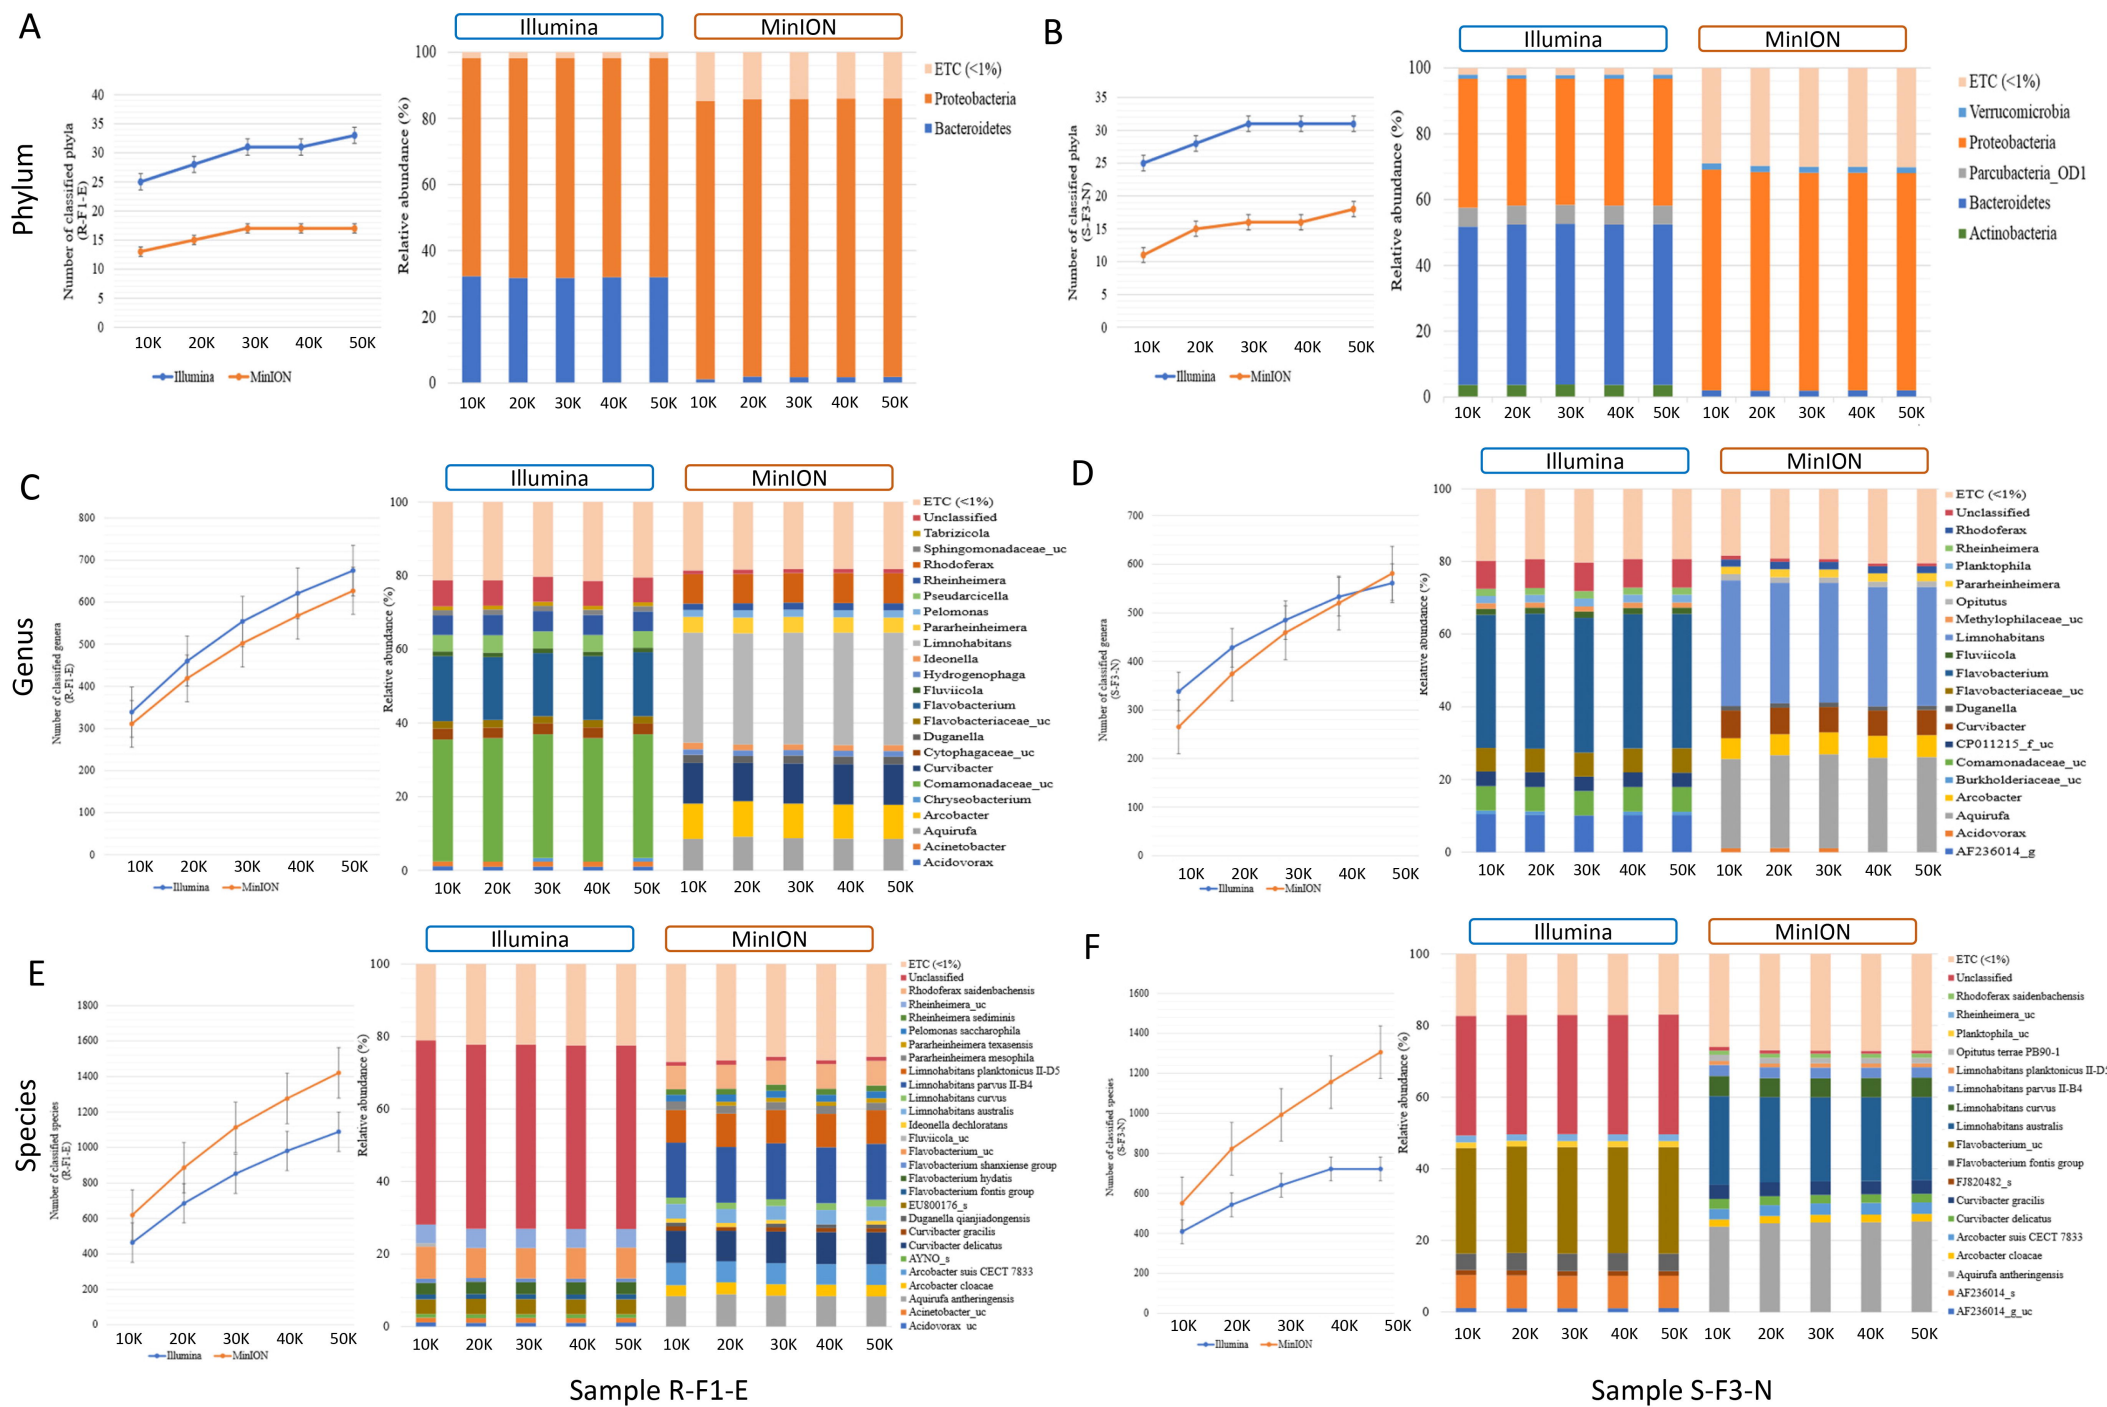

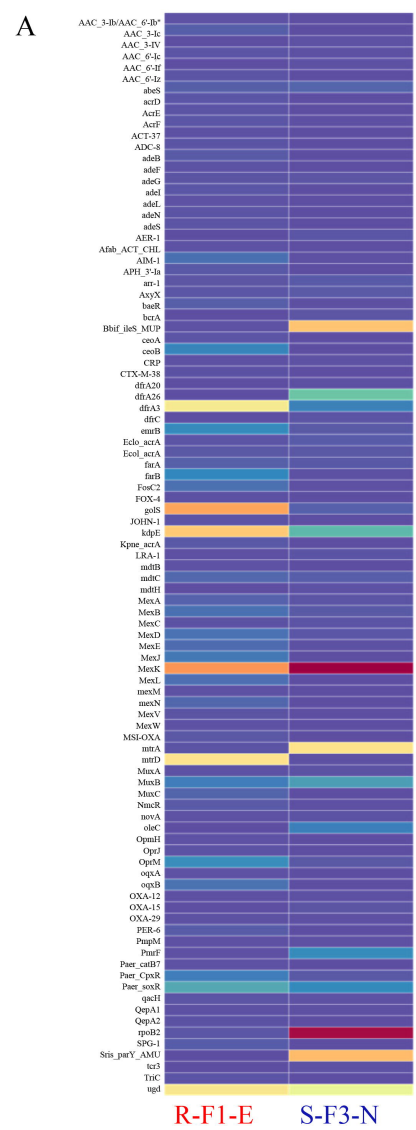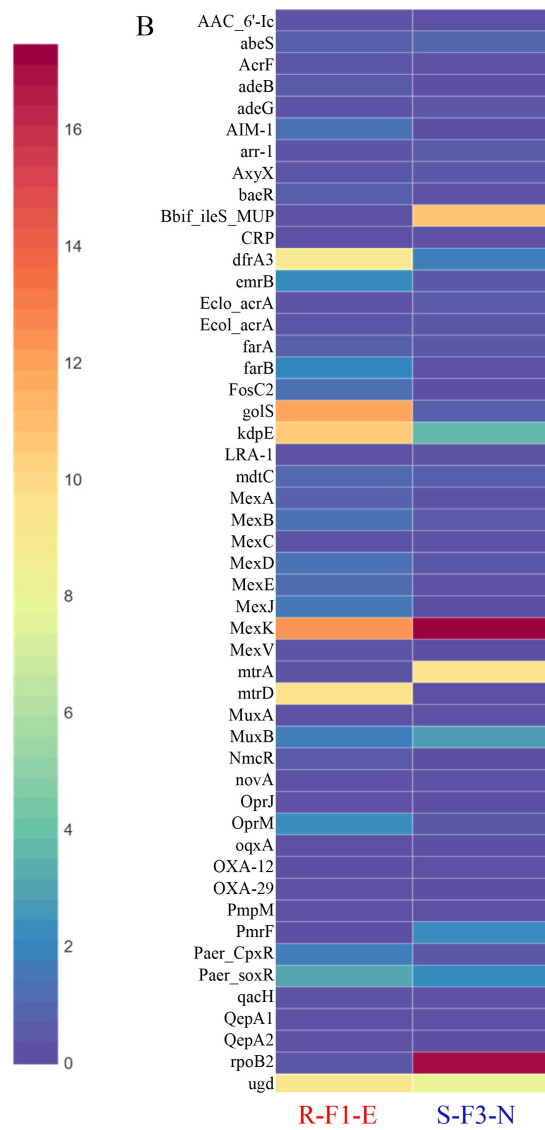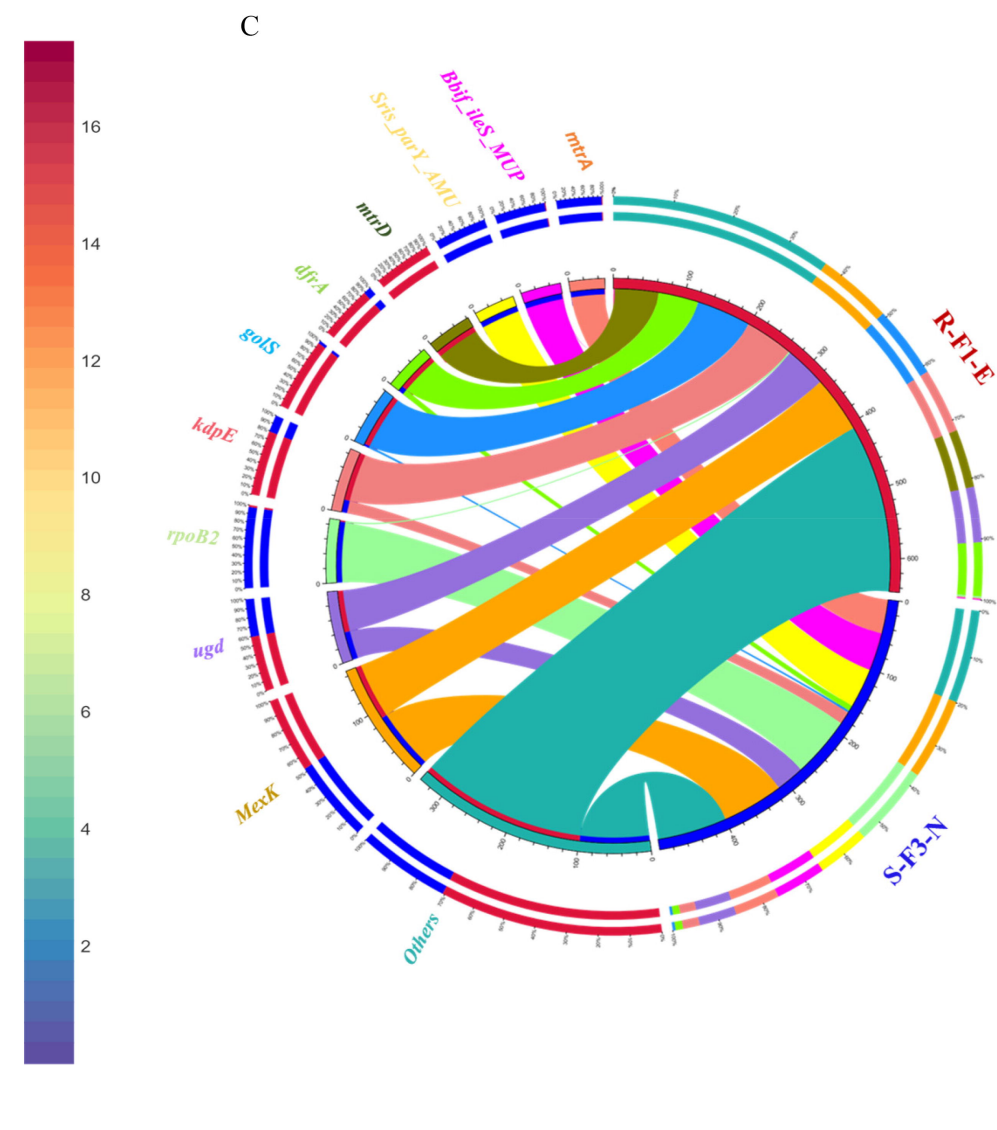

Source: https://www.biorxiv.org/content/10.1101/2022.07.01.498518v1.full.pdf
